# Supplementary material for: Evaluation of Genetic Variability within a Collection of Cumin Genotypes Using RAPD, ISSR, SRAP and SCoT Markers and Variability of In Vitro Callus Induced Therefrom
Source: MDPI journal article supplement (doi:10.3390/horticulturae9070742), 2023-06-24
Supplement: s1 [file s1]

**Table S1.** List of RAPD, ISSR, SCoT and SRAP primers utilized to test variability with a collection of cumin genotypes

| Primer      | Sequence 5'-3' | Primer      | Sequence 5'-3'              |
|-------------|----------------|-------------|-----------------------------|
| <b>RAPD</b> |                | <b>ISSR</b> |                             |
| OPA-01      | CAGGCCCTTC     | A           | (GACA)3RT                   |
| OPA-02      | TGCCGAGCTG     | B           | YR(GACA)3                   |
| OPA-03      | AGTCAGCCAC     | C           | (GACAC)2                    |
| OPA-04      | AATCGGGCTG     | UBC-112     | (GACA)4                     |
| OPA-05      | AGGGGTCTTG     | UBC-808     | (AG)8C                      |
| OPA-06      | GGTCCCTGAC     | UBC-809     | (AG)8G                      |
| OPA-09      | GGGTAACGCC     | UBC-811     | (GA)8C                      |
| OPA-10      | GTGATCGCAG     | UBC-818     | (CA)8G                      |
| OPA-11      | CAATCGCCGT     | UBC-820     | (ACTG)4                     |
| OPA-12      | TCGGCGATAG     | UBC-841     | (GACAC)4                    |
| OPA-14      | TCTGTGCTGG     | UBC-854     | (TC)8RG                     |
| OPA-17      | GACCGCTTGT     | UBC-855     | (AC)8YT                     |
| OPA-18      | AGGTGACCGT     | UBC-856     | (ACAC)4YG                   |
| OPA-19      | CAAACGTCGG     | UBC-857     | (AC)8T                      |
| OPB-02      | TGATCCCTGG     | UBC-864     | (ATG)4                      |
| OPB-03      | CATCCCCCTG     | <b>SCoT</b> |                             |
| OPB-09      | TGGGGGACTC     | SCoT-06     | CAACAATGGCTACCACGC          |
| OPD-20      | ACCCGGTCAC     | SCoT-08     | CAACAATGGCTACCACGT          |
| OPE-03      | CCAGATGCAC     | SCoT-12     | ACGACATGGCGACCAACG          |
| OPE-07      | AGATGCAGCC     | SCoT-17     | ACCATGGCTACCACCGAG          |
| OPE-14      | TGCGGCTGAG     | SCoT-25     | ACCATGGCTACCACCGGG          |
| OPE-18      | GGACTGCAGA     | SCoT-30     | CCATGGCTACCACCGGCG          |
| OPF-20      | GGTCTAGAGG     | SCoT-33     | CCATGGCTACCACCGCAG          |
| OPG-04      | AGCGTGTCTG     | <b>SRAP</b> |                             |
| OPG-18      | GGCTCATGTG     | Me1         | Fw 5'-TGAGTCCAAACCGGATA-3'  |
| OPH-05      | AGTCGTCCCC     | Me2         | Fw 5'-TGAGTCCAAACCGGAGC-3'  |
| OPH-13      | GACGCCACAC     | Me3         | Fw 5'-TGAGTCCAAACCGGAAT-3'  |
| OPH-16      | TCTCAGCTGG     | Me4         | Fw 5'-TGAGTCCAAACCGGACC-3'  |
| OPI-02      | GGAGGAGAGG     | Me5         | Fw 5'-TGAGTCCAAACCGGTGC-3'  |
| OPI-03      | CAGAAGCCCA     | Em1         | Rv 5'-GACTGCGTACGAATTAAT-3' |
| OPJ-04      | CCGAACACGG     | Em2         | Rv 5'-GACTGCGTACGAATTTGC-3' |
| OPJ-05      | CTCCATGGGG     | Em3         | Rv 5'-GACTGCGTACGAATTGAC-3' |
| OPJ-07      | CCTCTCGACA     | Em4         | Rv 5'-GACTGCGTACGAATTTGA-3' |
| OPJ-10      | AAGCCCGAGG     | Em5         | Rv 5'-GACTGCGTACGAATTAAC-3' |
| OPJ-14      | CACCCGGATG     | Em6         | Rv 5'-GACTGCGTACGAATTGCA-3' |
| OPJ-20      | AAGCGGCCTC     |             |                             |
| OPK-07      | AGCGAGCAAG     |             |                             |
| OPK-19      | CACAGGCGGA     |             |                             |
| OPL-07      | AGGCGGGAAC     |             |                             |
| OPL-12      | GGGCGGTACT     |             |                             |
| OPL-16      | AGGTTGCAGG     |             |                             |
| OPM-20      | AGGTCTTGGG     |             |                             |

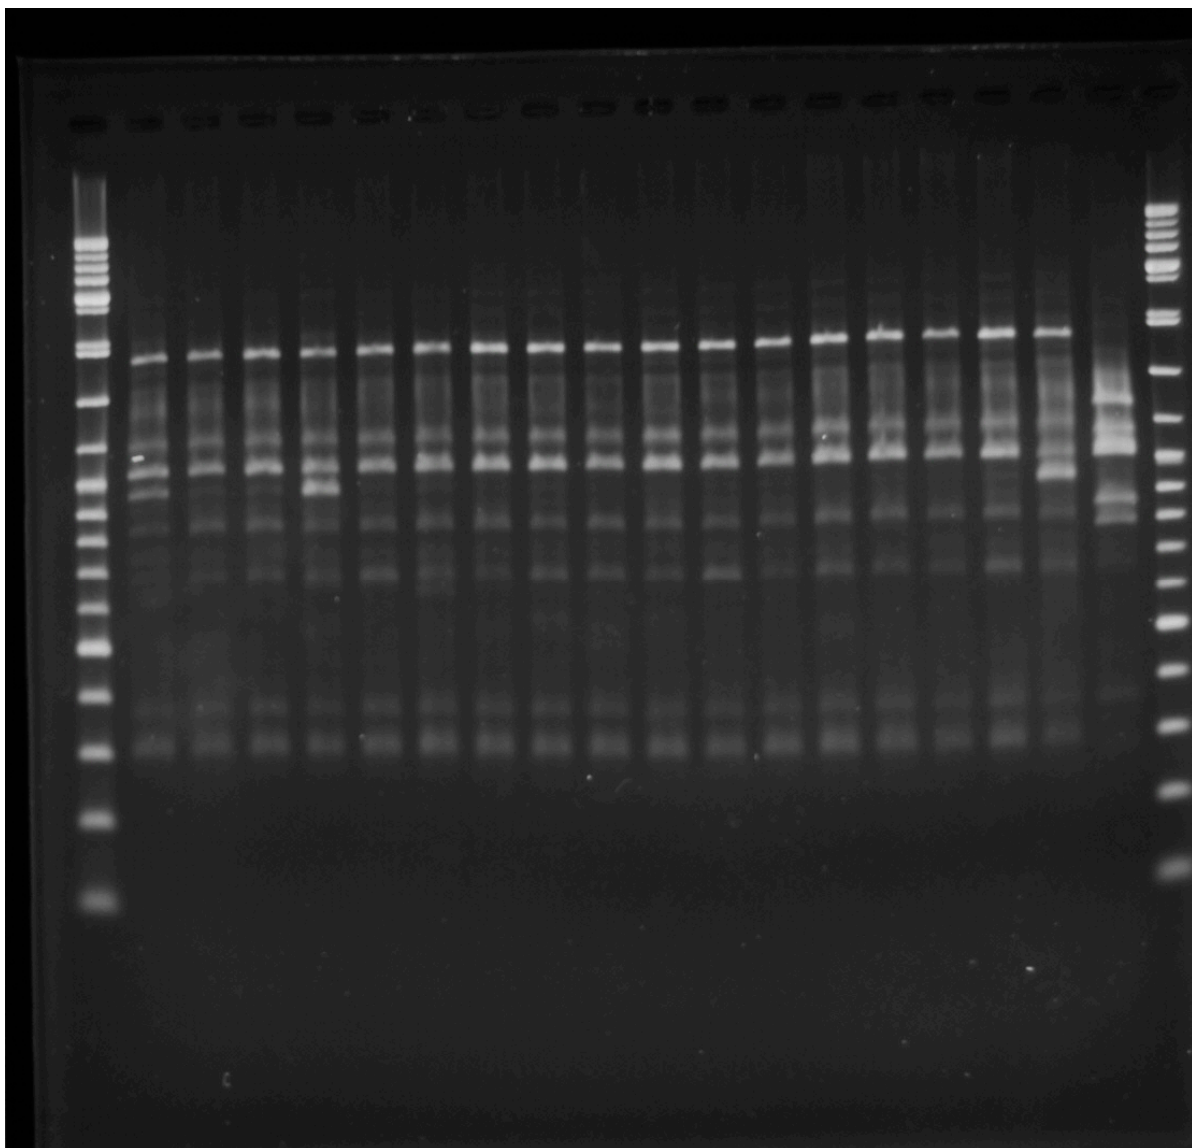

Figure S1. Products of agarose gel electrophoresis of RAPD-PCR amplification with OPA-01 primer for 17 cumin genotypes (lanes 2 to 18, in order from left to right: EG-01, EG-02, EG-03, EG-04, EG-05, EG-06, IPK-07, IPK-08, IPK-09, IPK-10, IPK-11, IPK-12, IPK-13, IPK-14, IPK-15, IPK-16 and GR-17 in addition to lane 19 for sweet fennel as a control ) using DNA size marker 100—10000 bp (lanes 1 and 20).

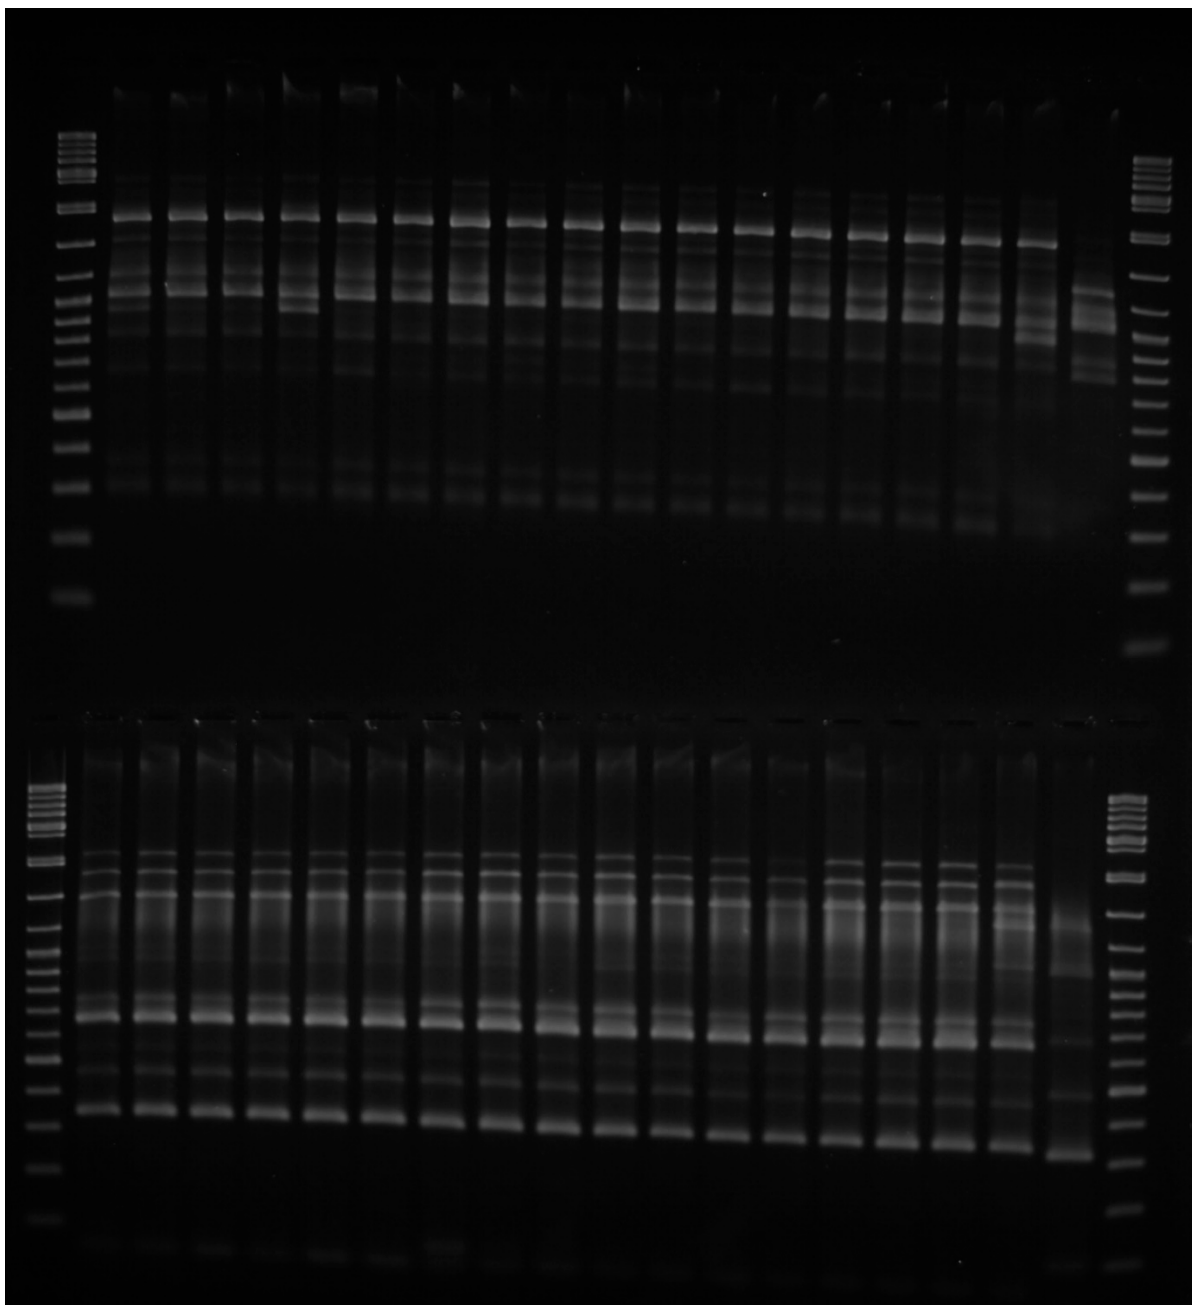

Figure S2. Products of agarose gel electrophoresis of RAPD-PCR amplification with OPA-10 (upper image) and OPA-19 (lower image) primers for 17 cumin genotypes (lanes 2 to 18, in order from left to right: EG-01, EG-02, EG-03, EG-04, EG-05, EG-06, IPK-07, IPK-08, IPK-09, IPK-10, IPK-11, IPK-12, IPK-13, IPK-14, IPK-15, IPK-16 and GR-17 in addition to lane 19 for sweet fennel as a control) using DNA size marker 100—10000 bp (lane 1).

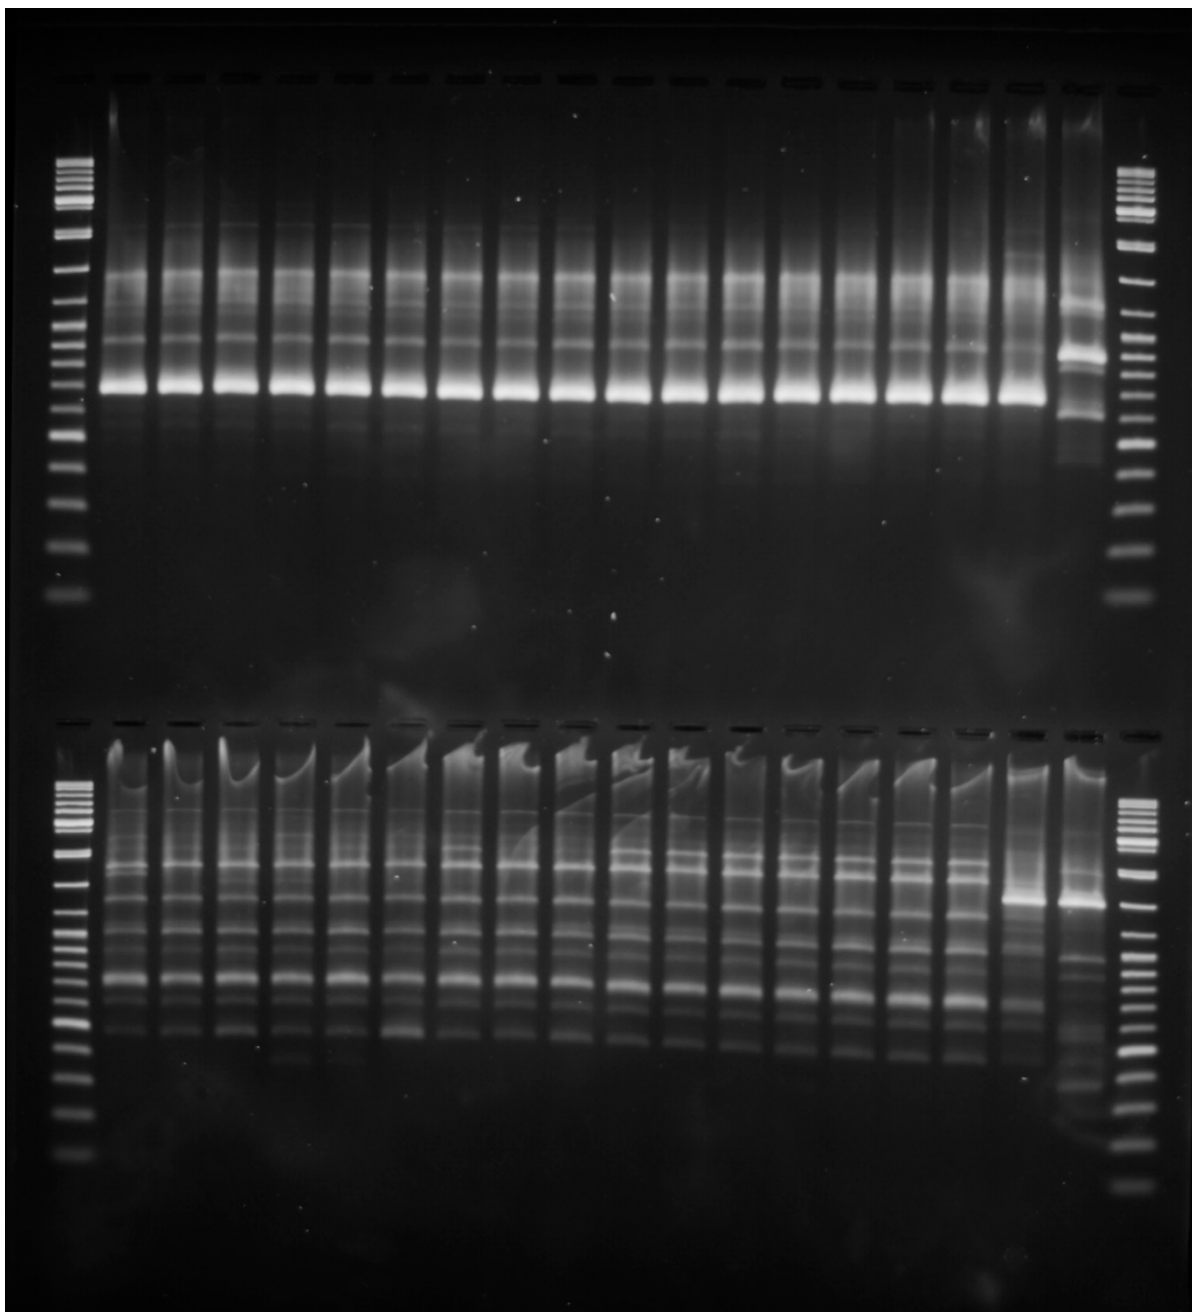

Figure S3. Products of agarose gel electrophoresis of RAPD-PCR amplification with OPA-09 (upper image) and OPA-11 (lower image) primers for 17 cumin genotypes (lanes 2 to 18, in order from left to right: EG-01, EG-02, EG-03, EG-04, EG-05, EG-06, IPK-07, IPK-08, IPK-09, IPK-10, IPK-11, IPK-12, IPK-13, IPK-14, IPK-15, IPK-16 and GR-17 in addition to lane 19 for sweet fennel as a control) using DNA size marker 100—10000 bp (lane 1).



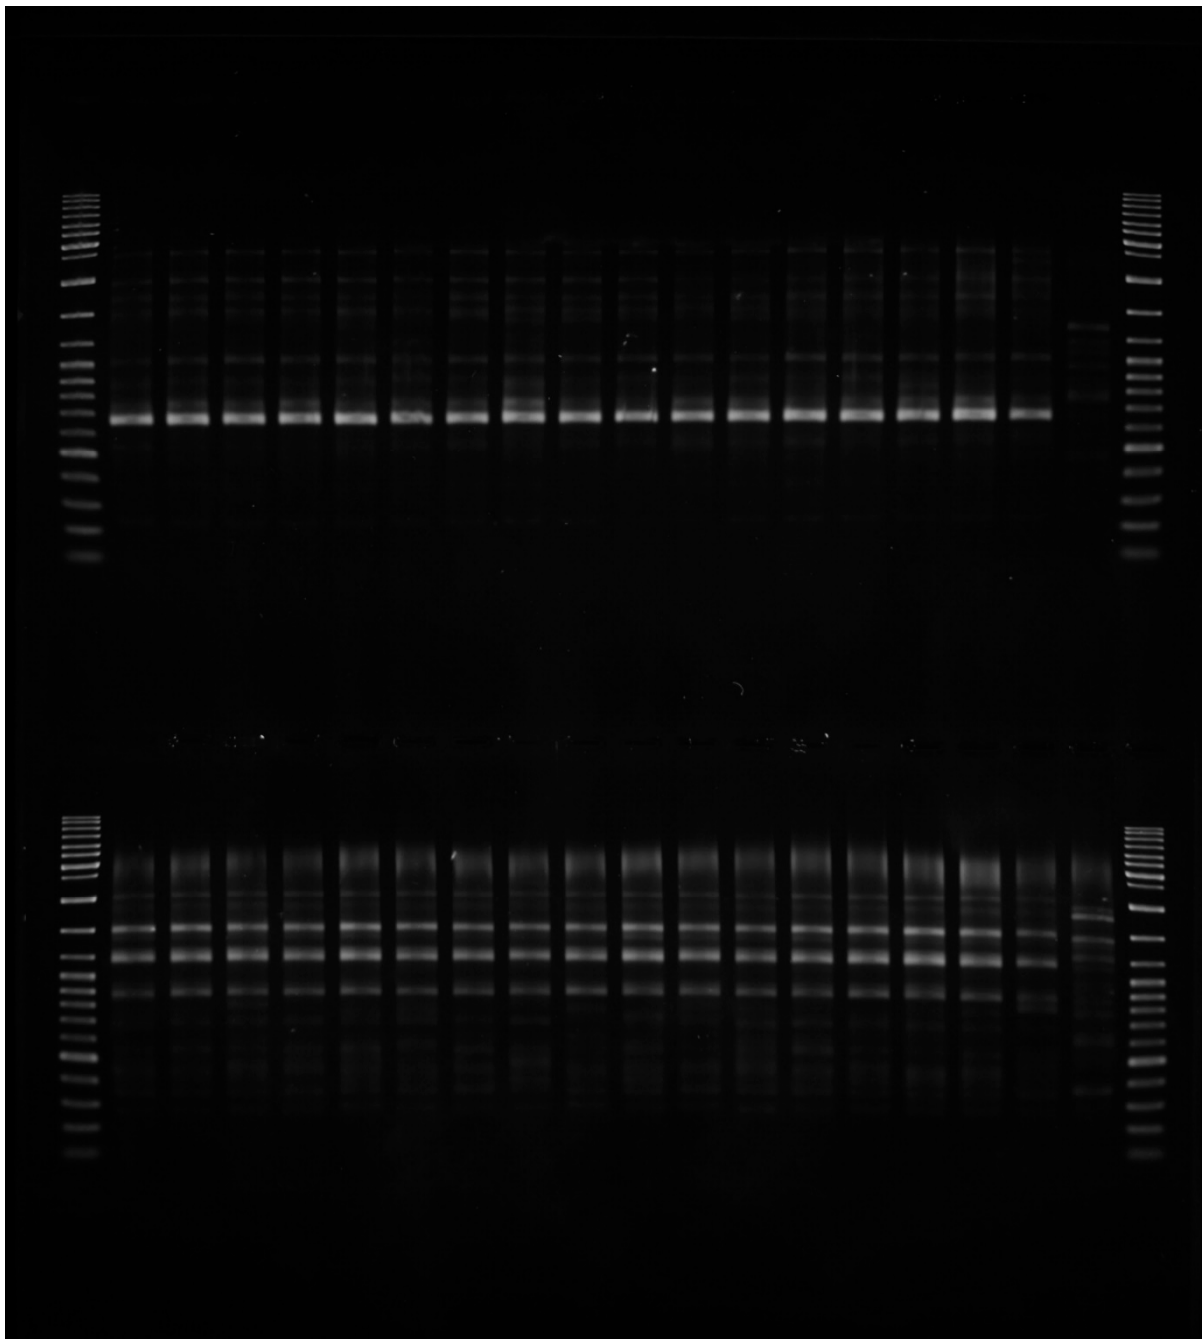

Figure S4. Products of agarose gel electrophoresis of RAPD-PCR amplification with OPB-02 (upper image) and OPB-03 (lower image) primers for 17 cumin genotypes (lanes 2 to 18, in order from left to right: EG-01, EG-02, EG-03, EG-04, EG-05, EG-06, IPK-07, IPK-08, IPK-09, IPK-10, IPK-11, IPK-12, IPK-13, IPK-14, IPK-15, IPK-16 and GR-17 in addition to lane 19 for sweet fennel as a control) using DNA size marker 100–10000 bp (lane 1).

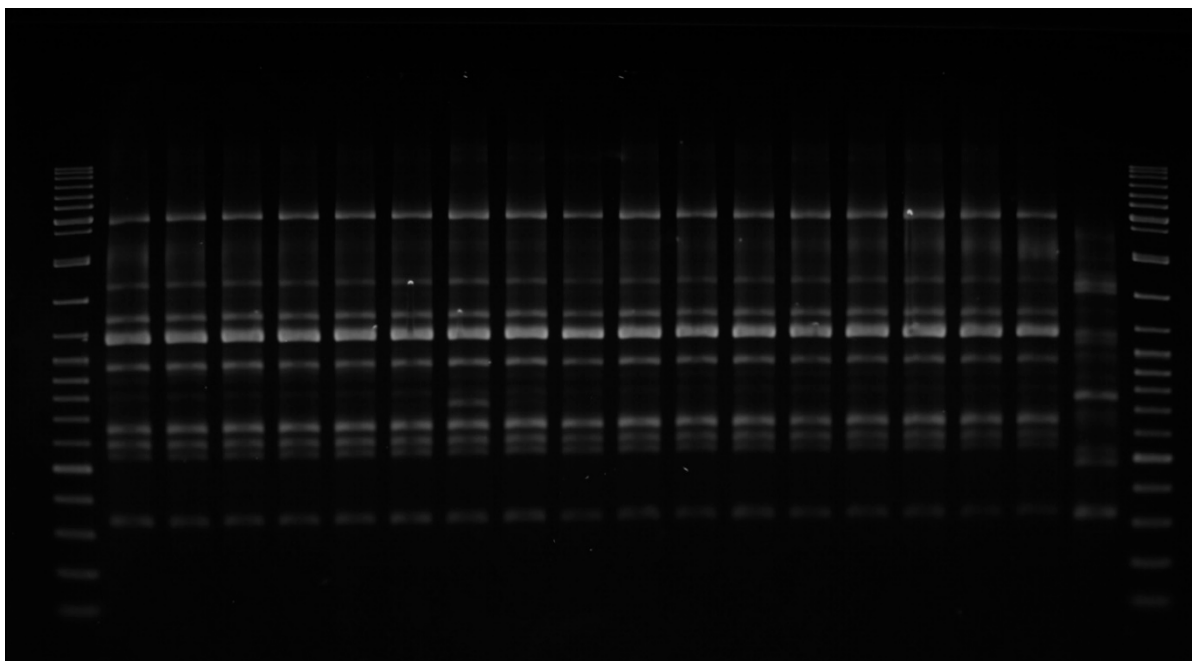

Figure S5. Products of agarose gel electrophoresis of RAPD-PCR amplification with OPG-18 primer for 17 cumin genotypes (lanes 2 to 18, in order from left to right: EG-01, EG-02, EG-03, EG-04, EG-05, EG-06, IPK-07, IPK-08, IPK-09, IPK-10, IPK-11, IPK-12, IPK-13, IPK-14, IPK-15, IPK-16 and GR-17 in addition to lane 19 for sweet fennel as a control) using DNA size marker 100—10000 bp (lane 1).

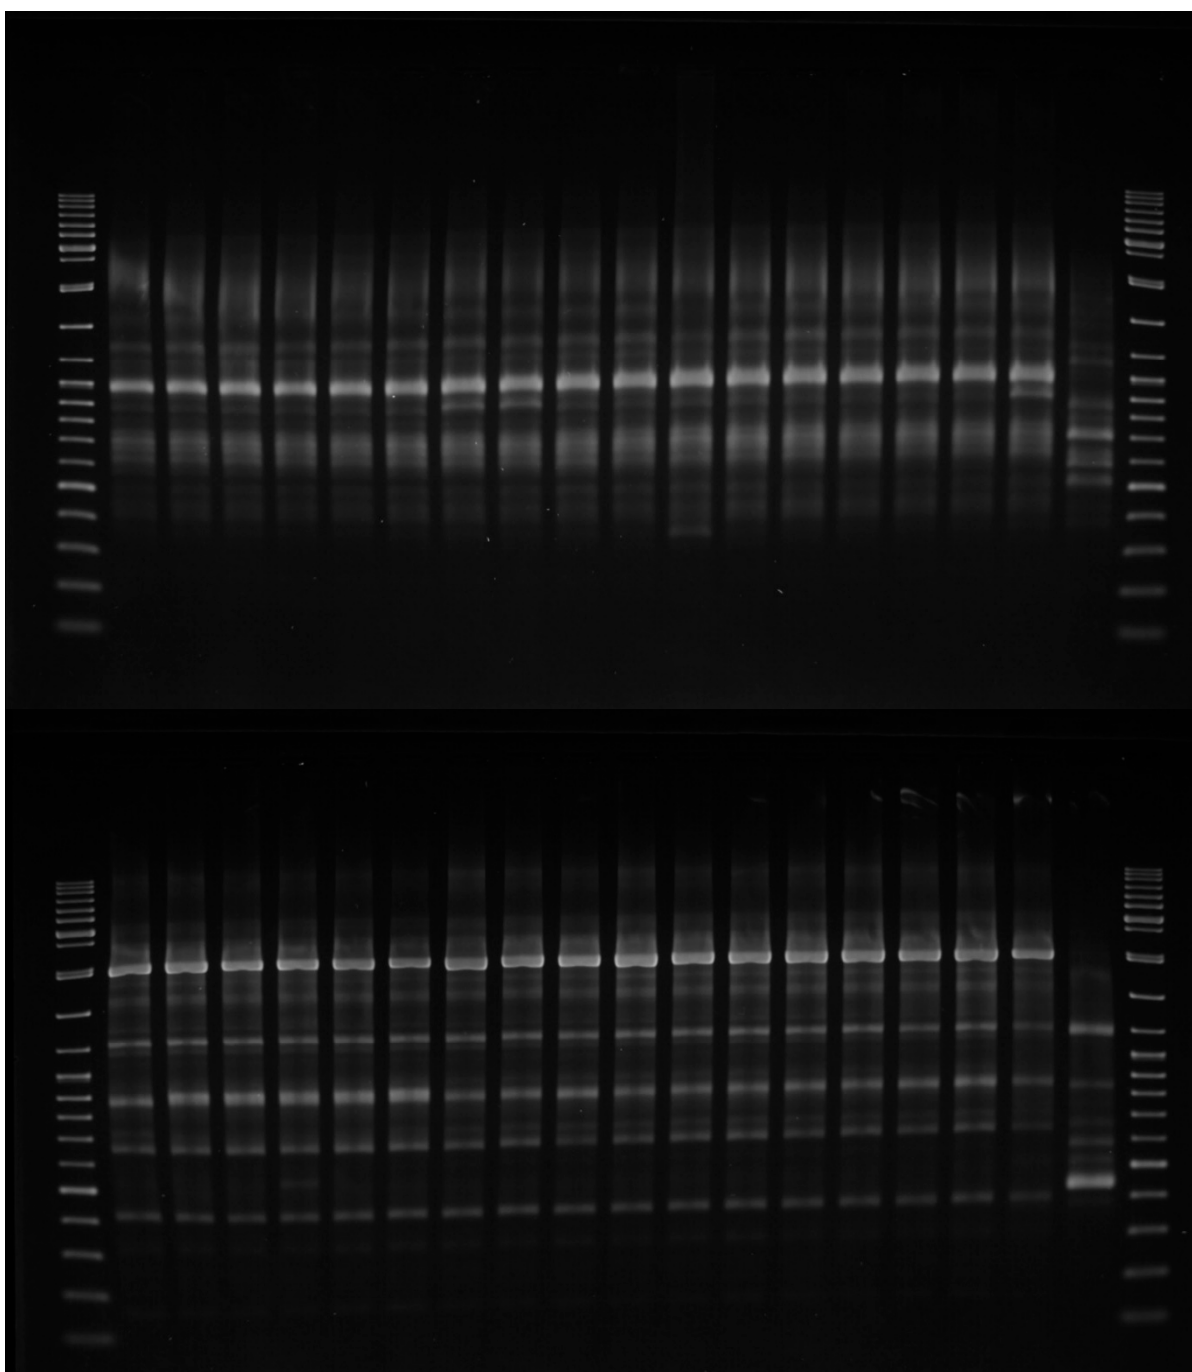

Figure S6. Products of agarose gel electrophoresis of RAPD-PCR amplification with OPL-16 (upper image) and OPL-07 (lower image) primers of 17 cumin genotypes (lanes 2 to 18, in order from left to right: EG-01, EG-02, EG-03, EG-04, EG-05, EG-06, IPK-07, IPK-08, IPK-09, IPK-10, IPK-11, IPK-12, IPK-13, IPK-14, IPK-15, IPK-16 and GR-17 in addition to lane 19 for sweet fennel as a control) using DNA size marker 100—10000 bp (lane 1).

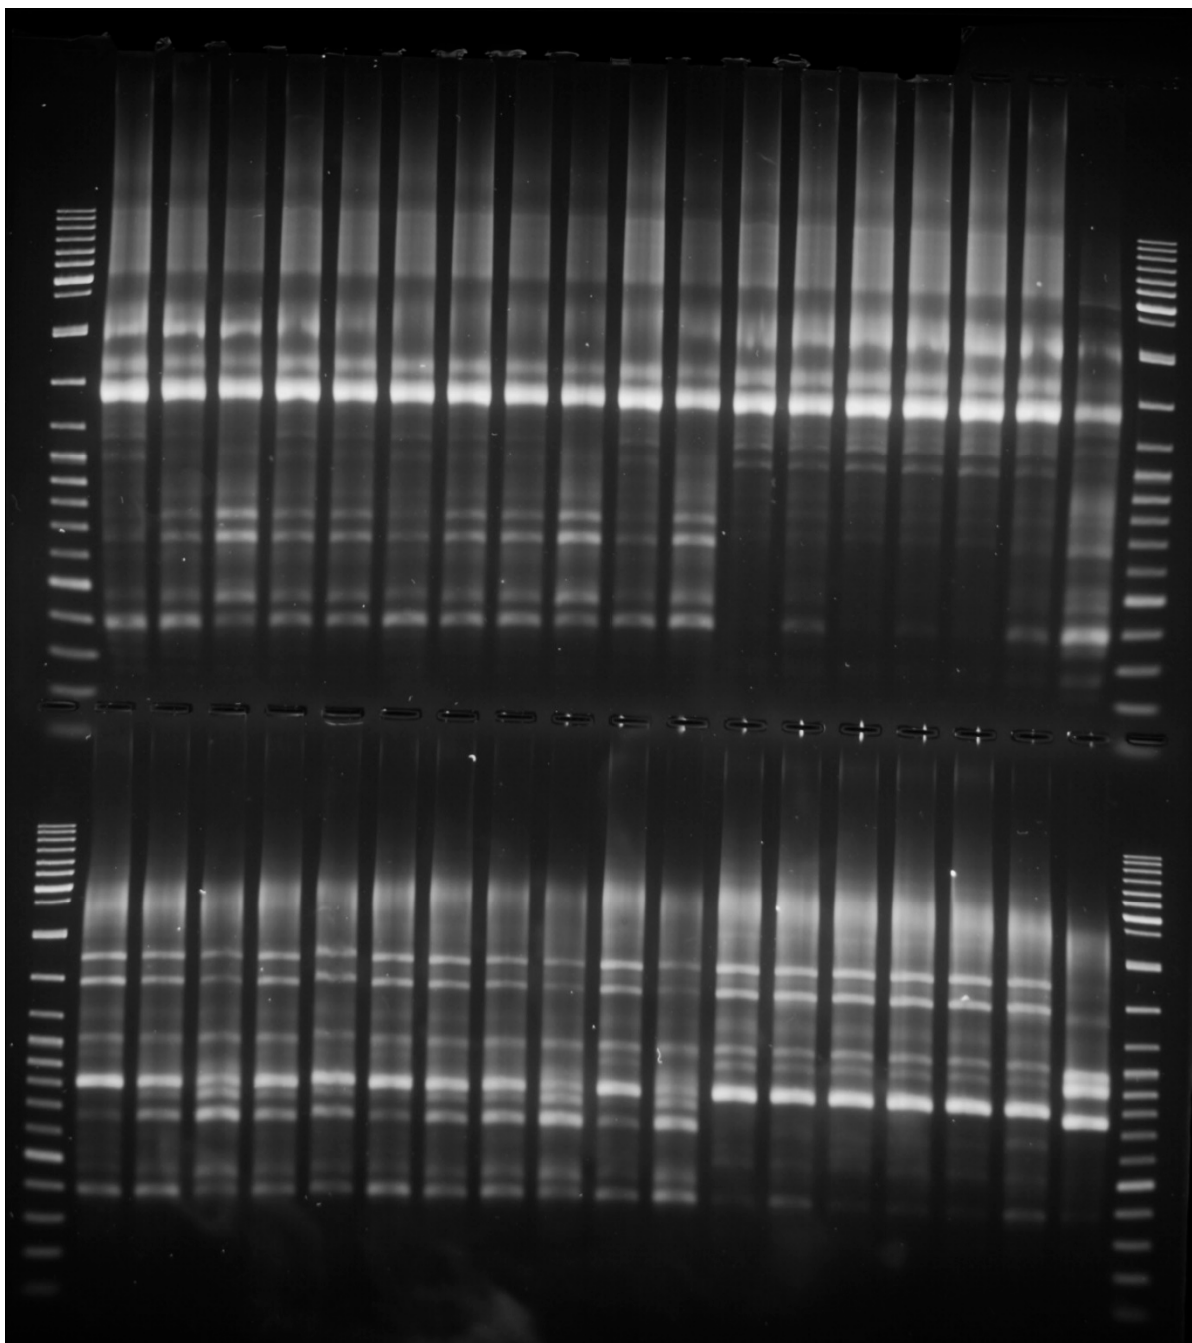

Figure S7. Products of agarose gel electrophoresis of ISSR-PCR amplification with A (upper image) and B (lower image) primers for 17 cumin genotypes (lanes 2 to 18, in order from left to right: EG-01, EG-02, EG-03, EG-04, EG-05, EG-06, IPK-07, IPK-08, IPK-09, IPK-10, IPK-11, IPK-12, IPK-13, IPK-14, IPK-15, IPK-16 and GR-17 in addition to lane 19 for sweet fennel as a control) using DNA size marker 100–10000 bp (lane 1).

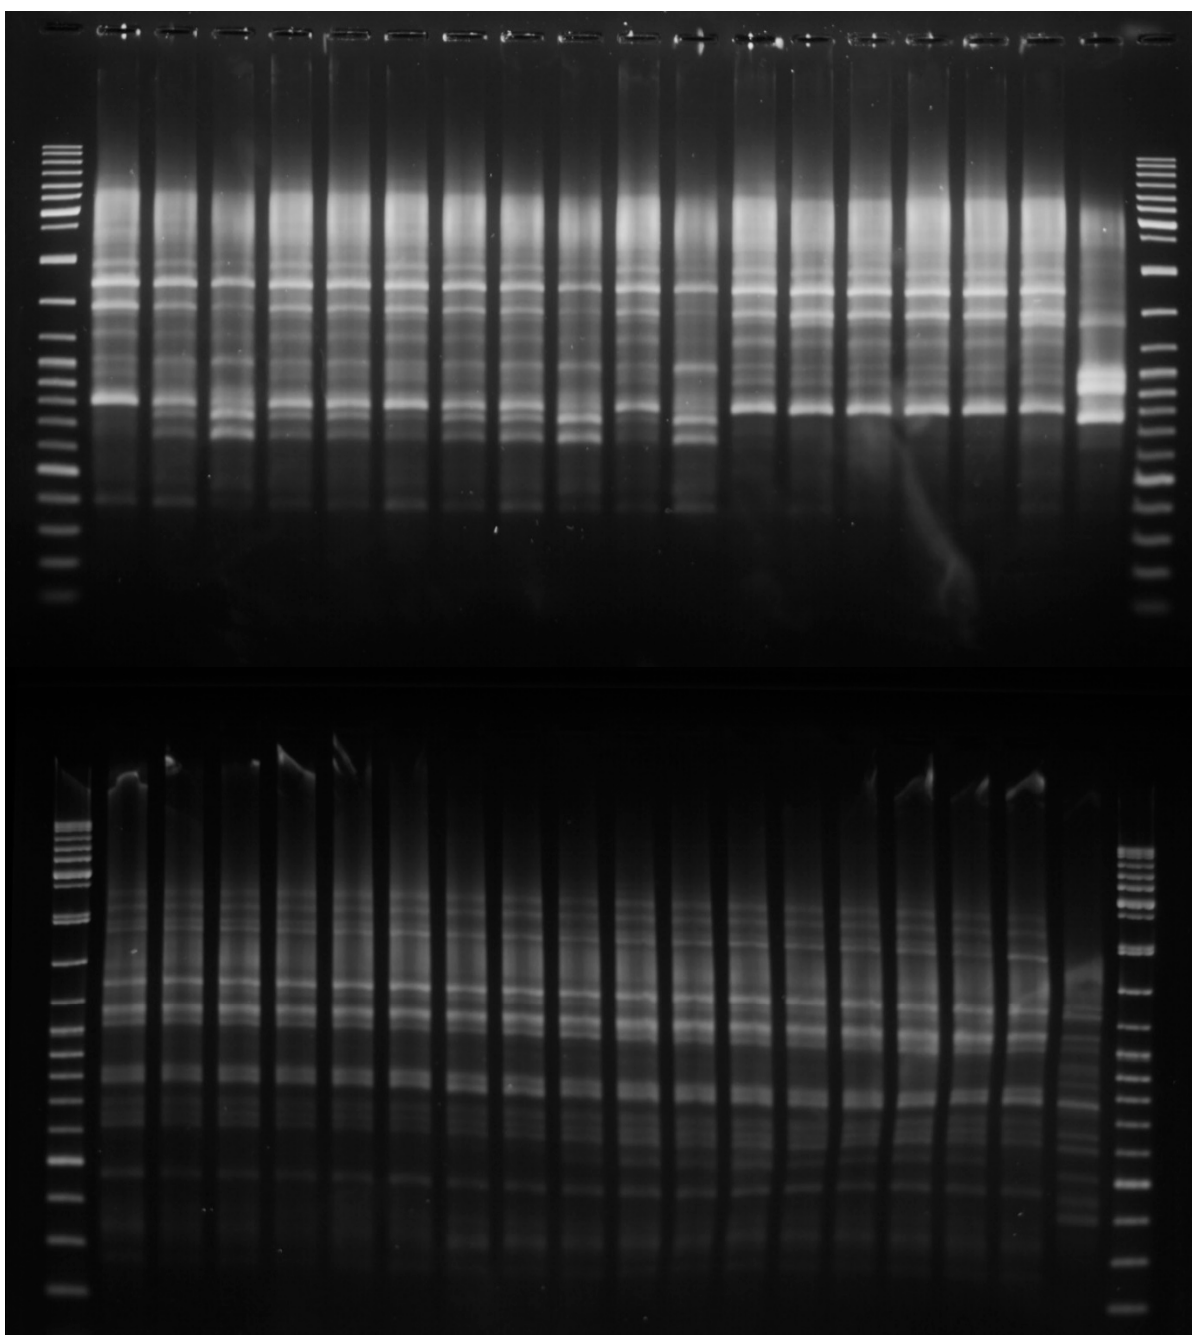

Figure S8. Products of agarose gel electrophoresis of ISSR-PCR amplification UBC-112 (upper image) and UBC - 818 (lower image) primers for 17 cumin genotypes (lanes 2 to 18, in order from left to right: EG-01, EG-02, EG-03, EG-04, EG-05, EG-06, IPK-07, IPK-08, IPK-09, IPK-10, IPK-11, IPK-12, IPK-13, IPK-14, IPK-15, IPK-16 and GR-17 in addition to lane 19 for sweet fennel as a control) using DNA size marker 100–10000 bp (lane 1).

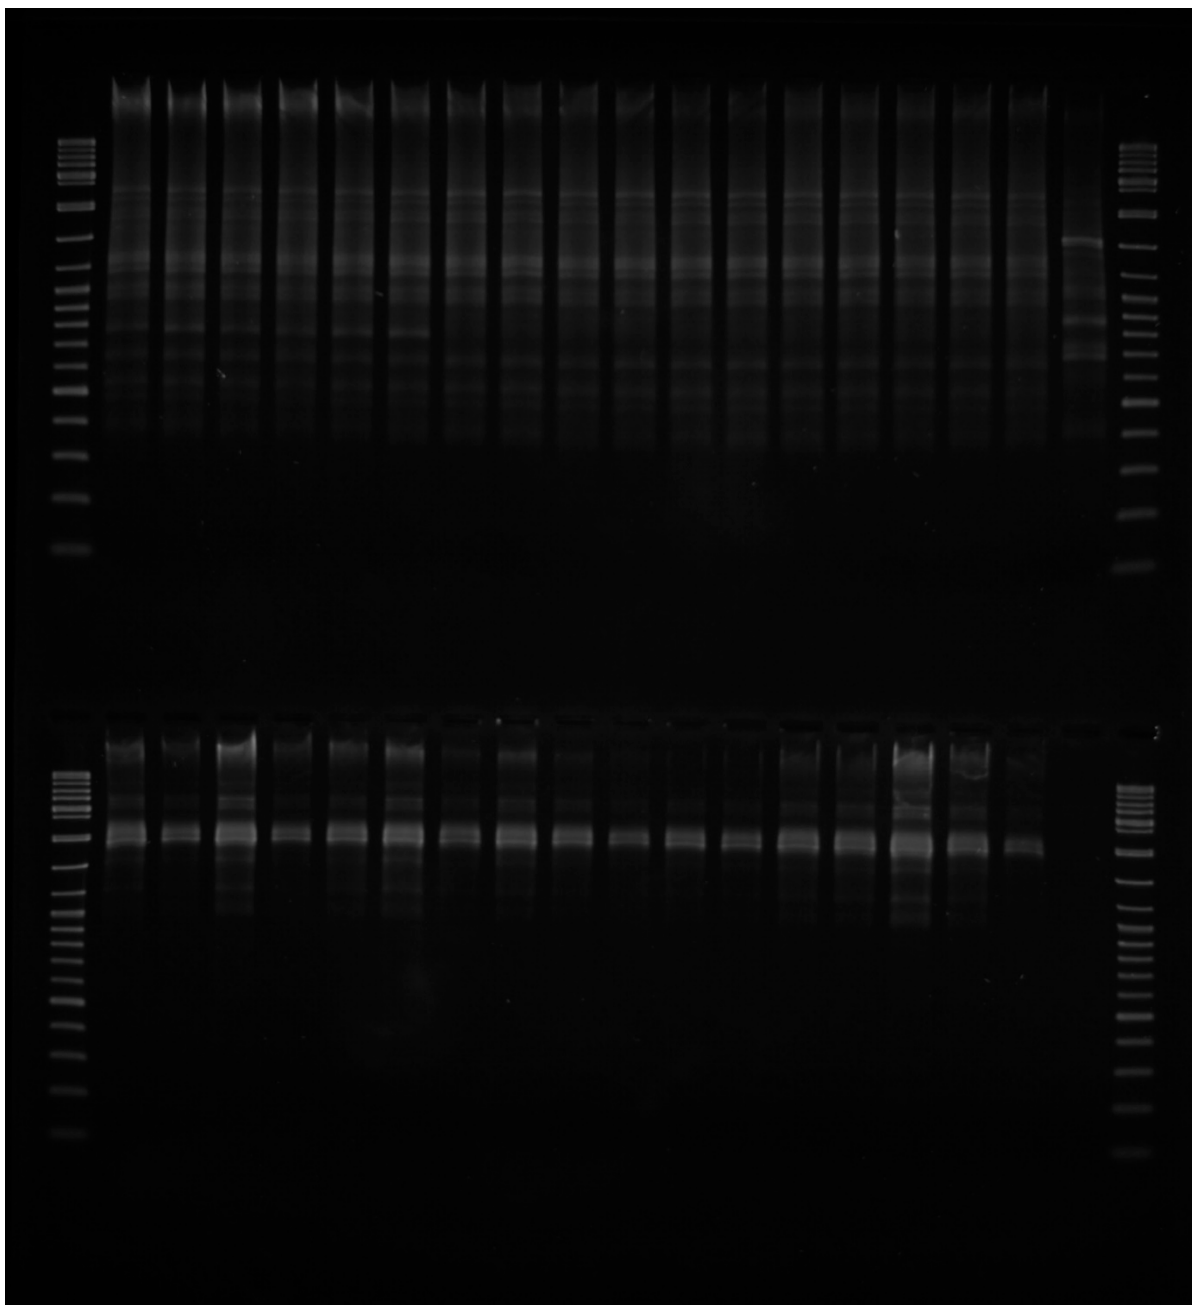

Figure S9. Products of agarose gel electrophoresis of ISSR-PCR amplification UBC-841 (upper image) and UBC - 854 (lower image) primers for 17 cumin genotypes (lanes 2 to 18, in order from left to right: EG-01, EG-02, EG-03, EG-04, EG-05, EG-06, IPK-07, IPK-08, IPK-09, IPK-10, IPK-11, IPK-12, IPK-13, IPK-14, IPK-15, IPK-16 and GR-17 in addition to lane 19 for sweet fennel as a control) using DNA size marker 100–10000 bp (lane 1).

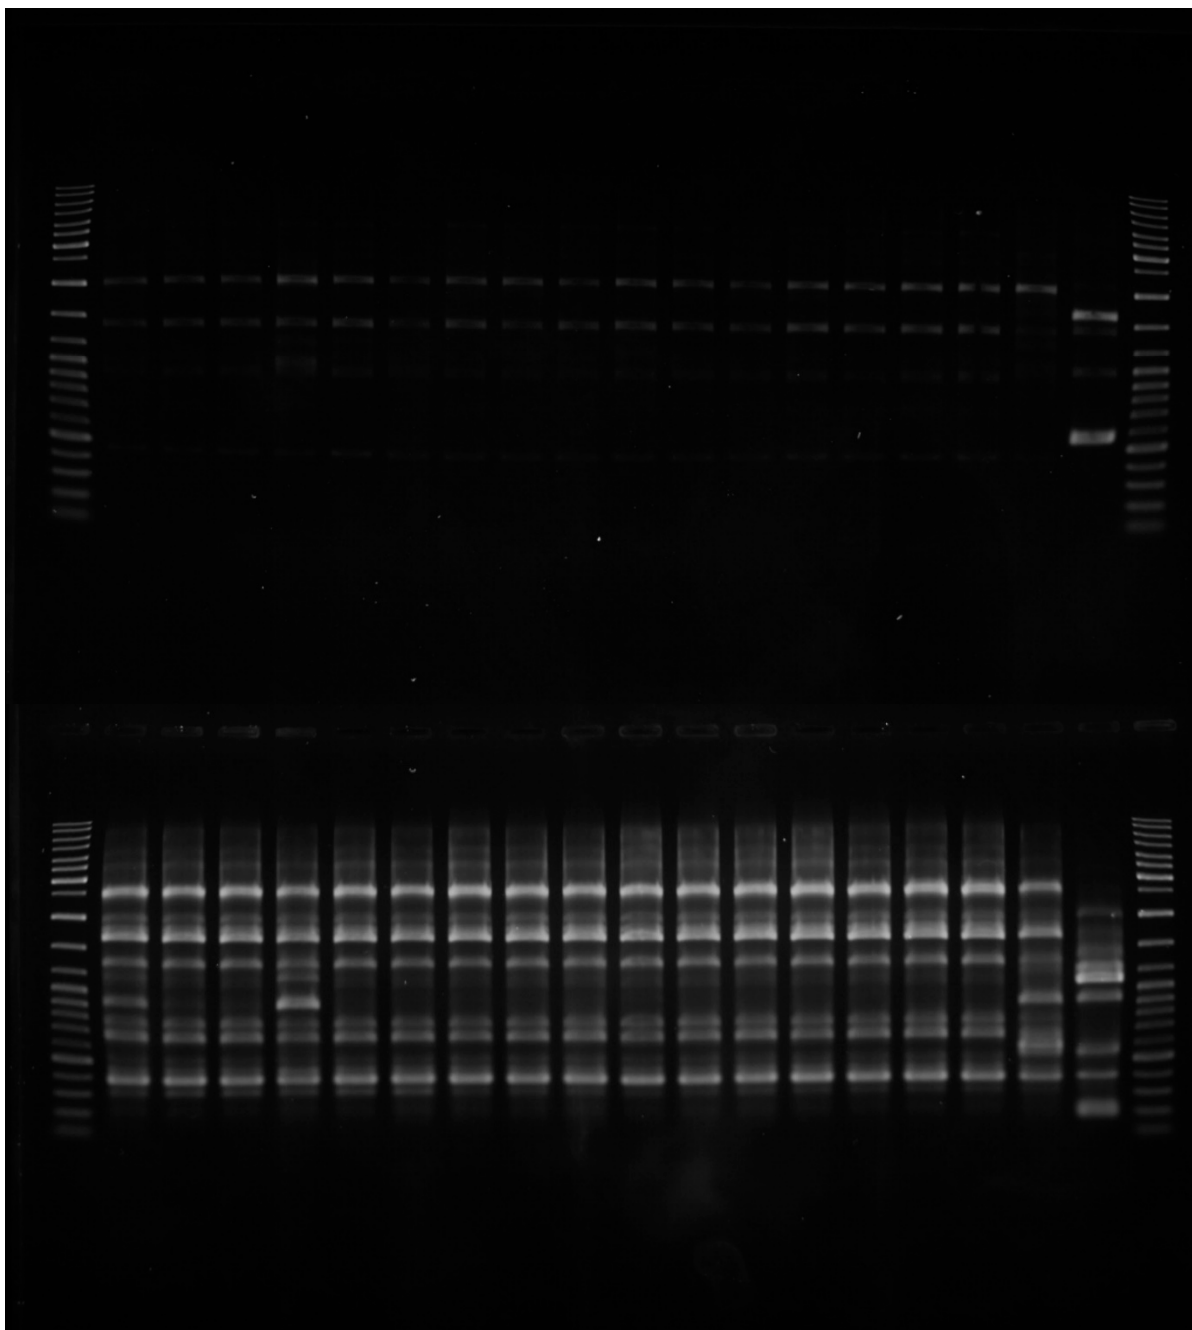

Figure S10. Products of agarose gel electrophoresis of SCOT-PCR amplification with 06 (upper image) and 12 (lower image) primers for 17 cumin genotypes (lanes 2 to 18, in order from left to right: EG-01, EG-02, EG-03, EG-04, EG-05, EG-06, IPK-07, IPK-08, IPK-09, IPK-10, IPK-11, IPK-12, IPK-13, IPK-14, IPK-15, IPK-16 and GR-17 in addition to lane 19 for sweet fennel as a control) using DNA size marker 100–10000 bp (lane 1).

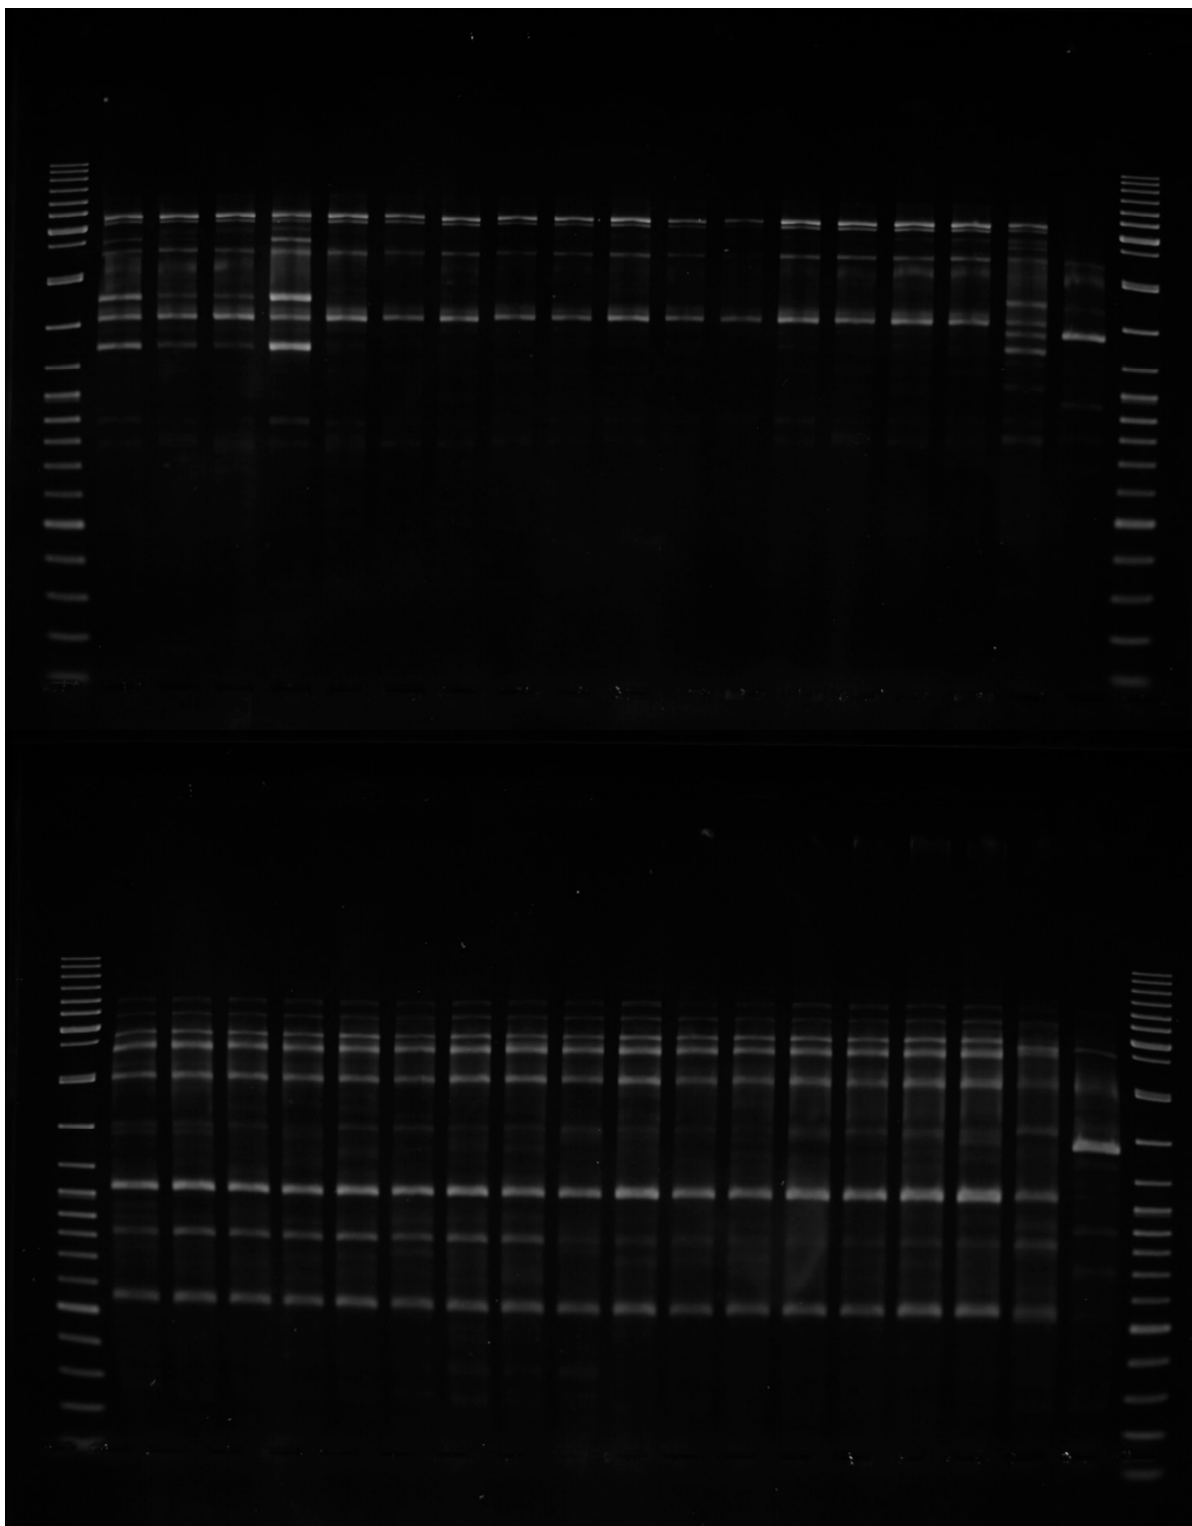

Figure S11. Products of agarose gel electrophoresis of SCOT-PCR amplification with 17 (upper image) and 25 (lower image) primers for 17 cumin genotypes (lanes 2 to 18, in order from left to right: EG-01, EG-02, EG-03, EG-04, EG-05, EG-06, IPK-07, IPK-08, IPK-09, IPK-10, IPK-11, IPK-12, IPK-13, IPK-14, IPK-15, IPK-16 and GR-17 in addition to lane 19 for sweet fennel as a control) using DNA size marker 100–10000 bp (lane 1).



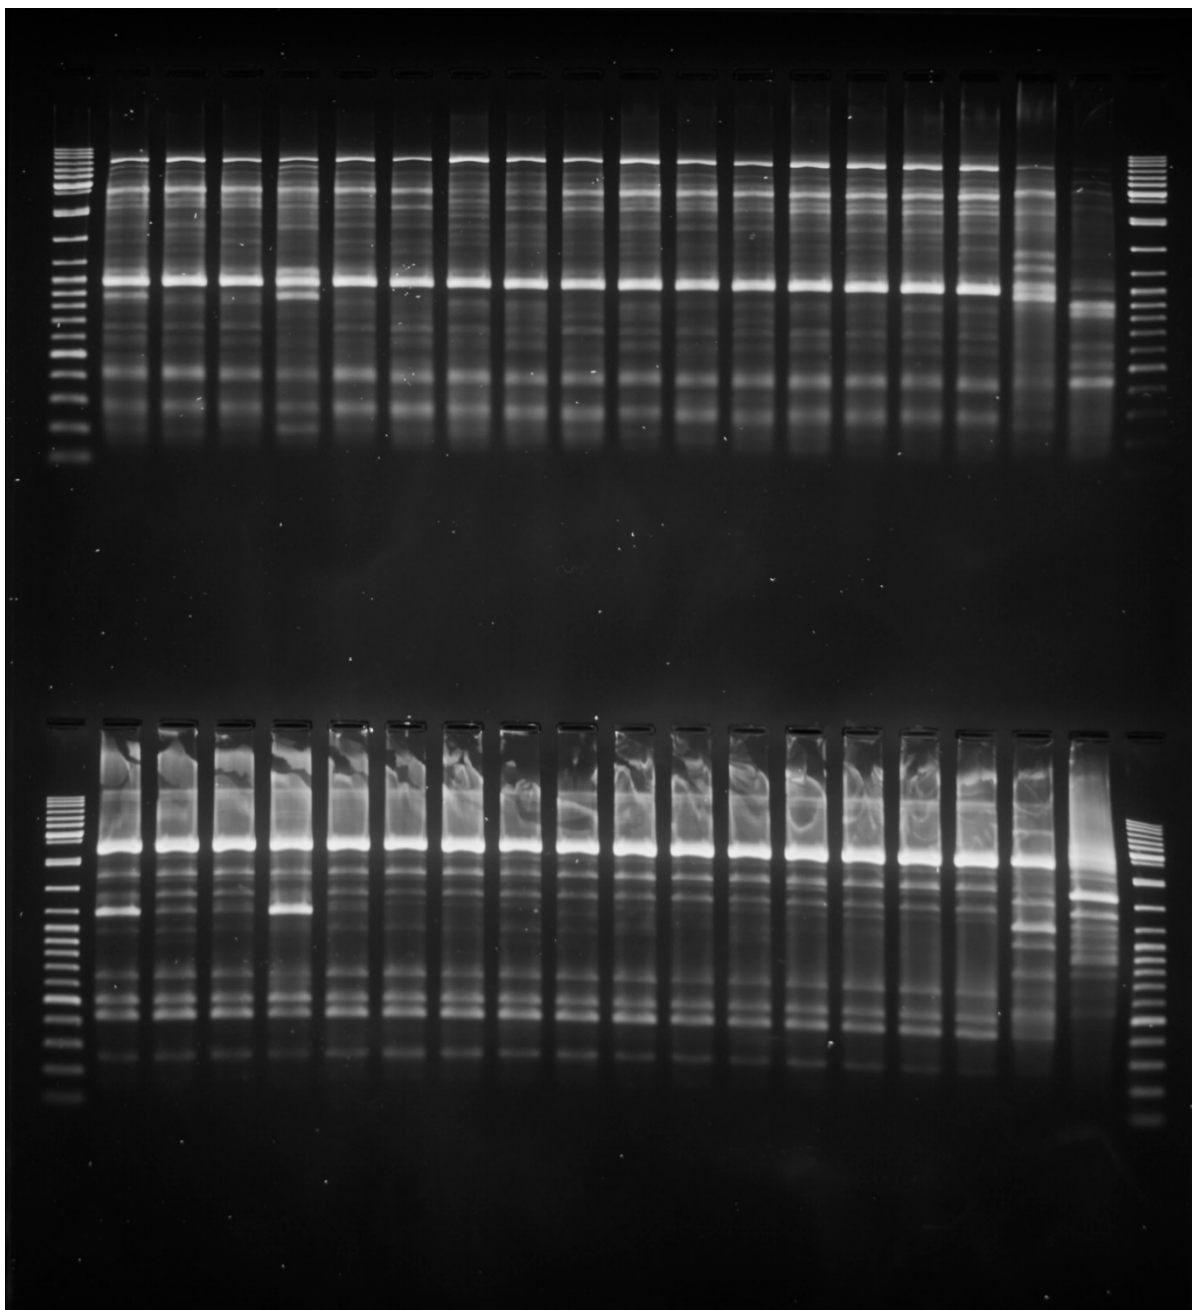

Figure S12. Products of agarose gel electrophoresis of SCOT-PCR amplification with 30 (upper image) and 33 (lower image) primers for 17 cumin genotypes (lanes 2 to 18, in order from left to right: EG-01, EG-02, EG-03, EG-04, EG-05, EG-06, IPK-07, IPK-08, IPK-09, IPK-10, IPK-11, IPK-12, IPK-13, IPK-14, IPK-15, IPK-16 and GR-17 in addition to lane 19 for sweet fennel as a control) using DNA size marker 100–10000 bp (lane 1).

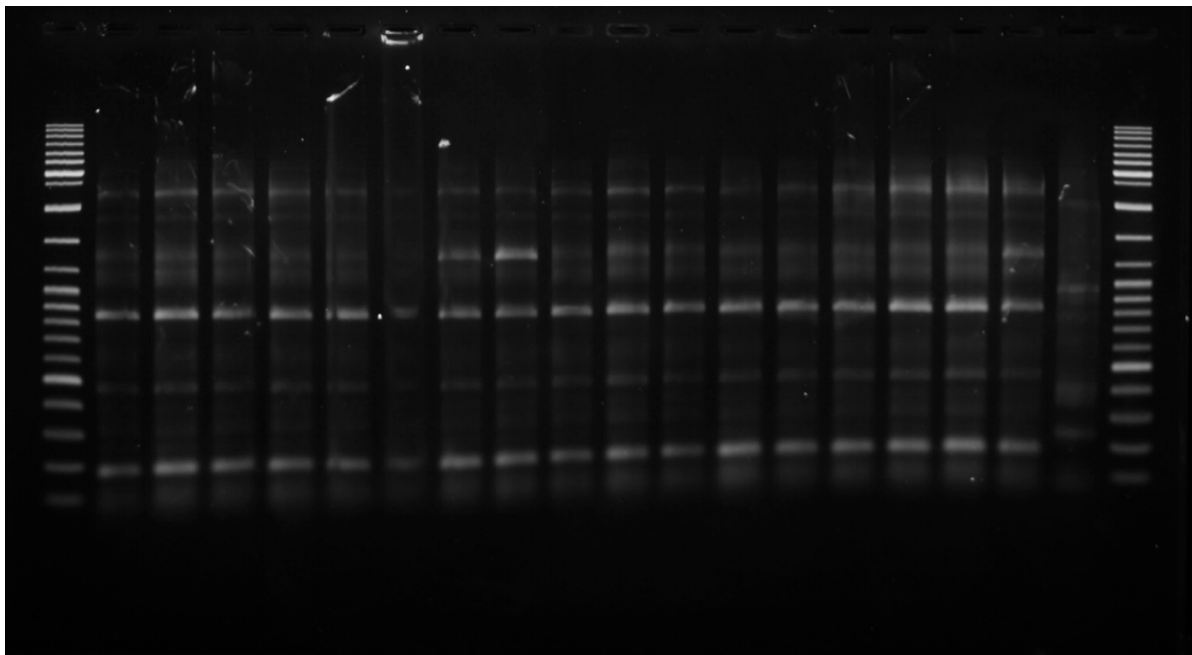

Figure S13. Products of agarose gel electrophoresis of SRAP-PCR amplification with Me3/Em2 primers for 17 cumin genotypes (lanes 2 to 18, in order from left to right: EG-01, EG-02, EG-03, EG-04, EG-05, EG-06, IPK-07, IPK-08, IPK-09, IPK-10, IPK-11, IPK-12, IPK-13, IPK-14, IPK-15, IPK-16 and GR-17 in addition to lane 19 for sweet fennel as a control) using DNA size marker 100–10000 bp (lane 1).

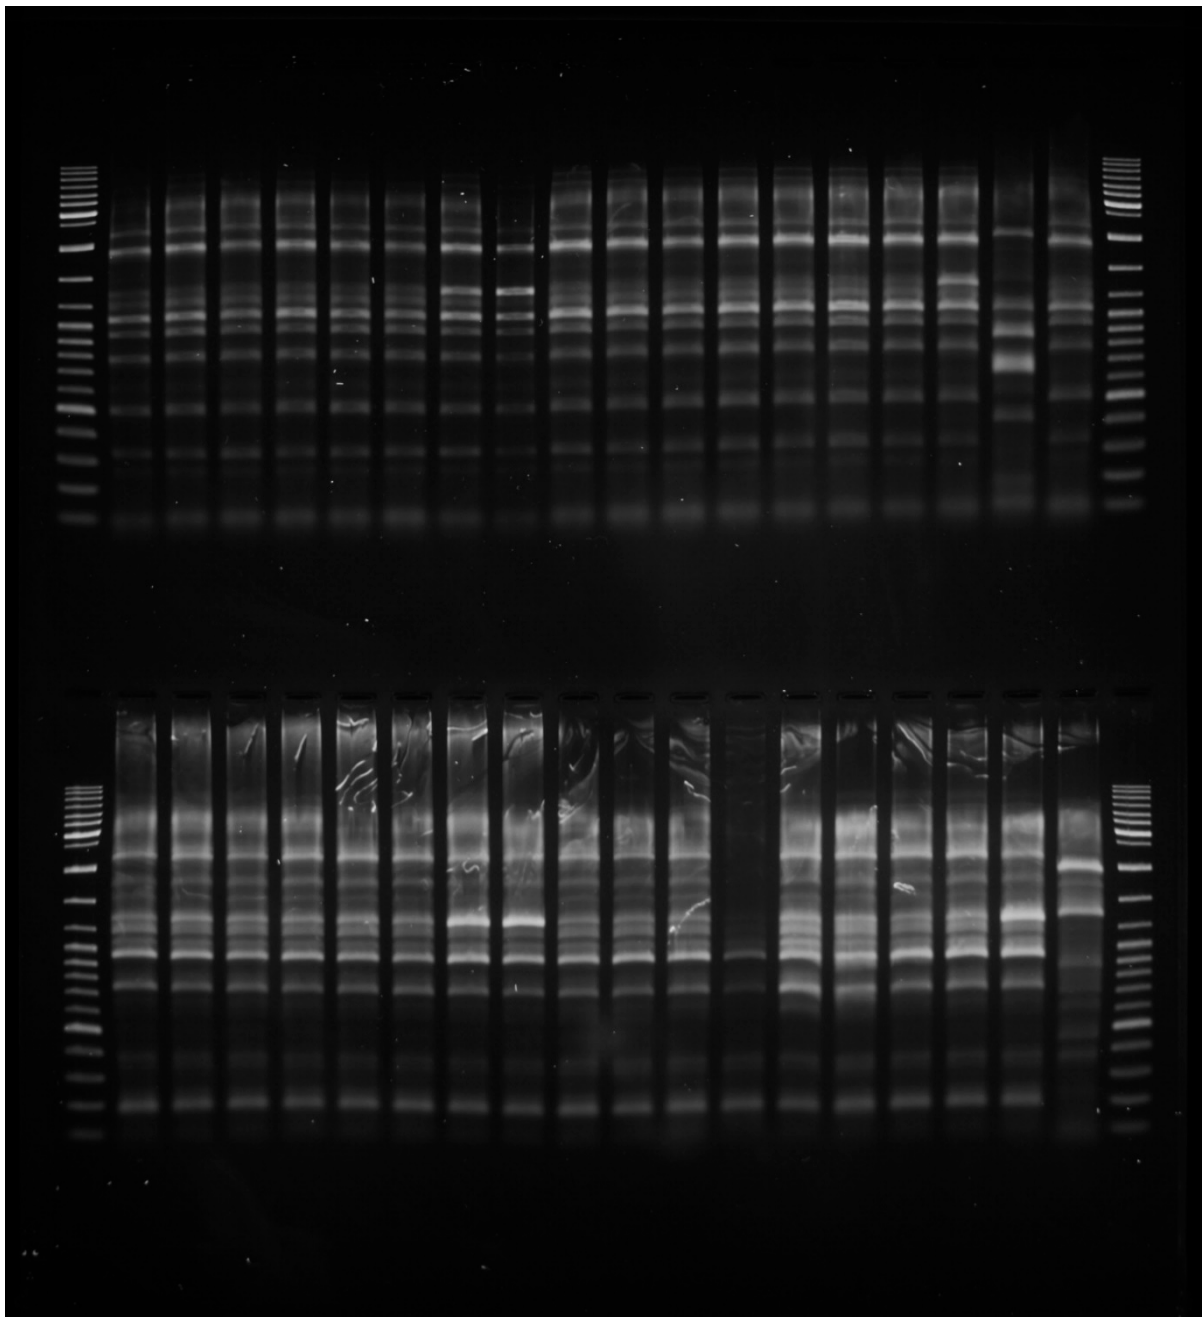

Figure S14. Products of agarose gel electrophoresis of SRAP-PCR amplification with Me3/Em3 (upper image) and Me3/Em4 (lower image) primers for 17 cumin genotypes (lanes 2 to 18, in order from left to right: EG-01, EG-02, EG-03, EG-04, EG-05, EG-06, IPK-07, IPK-08, IPK-09, IPK-10, IPK-11, IPK-12, IPK-13, IPK-14, IPK-15, IPK-16 and GR-17 in addition to lane 19 for sweet fennel as a control) using DNA size marker 100–10000 bp (lane 1).

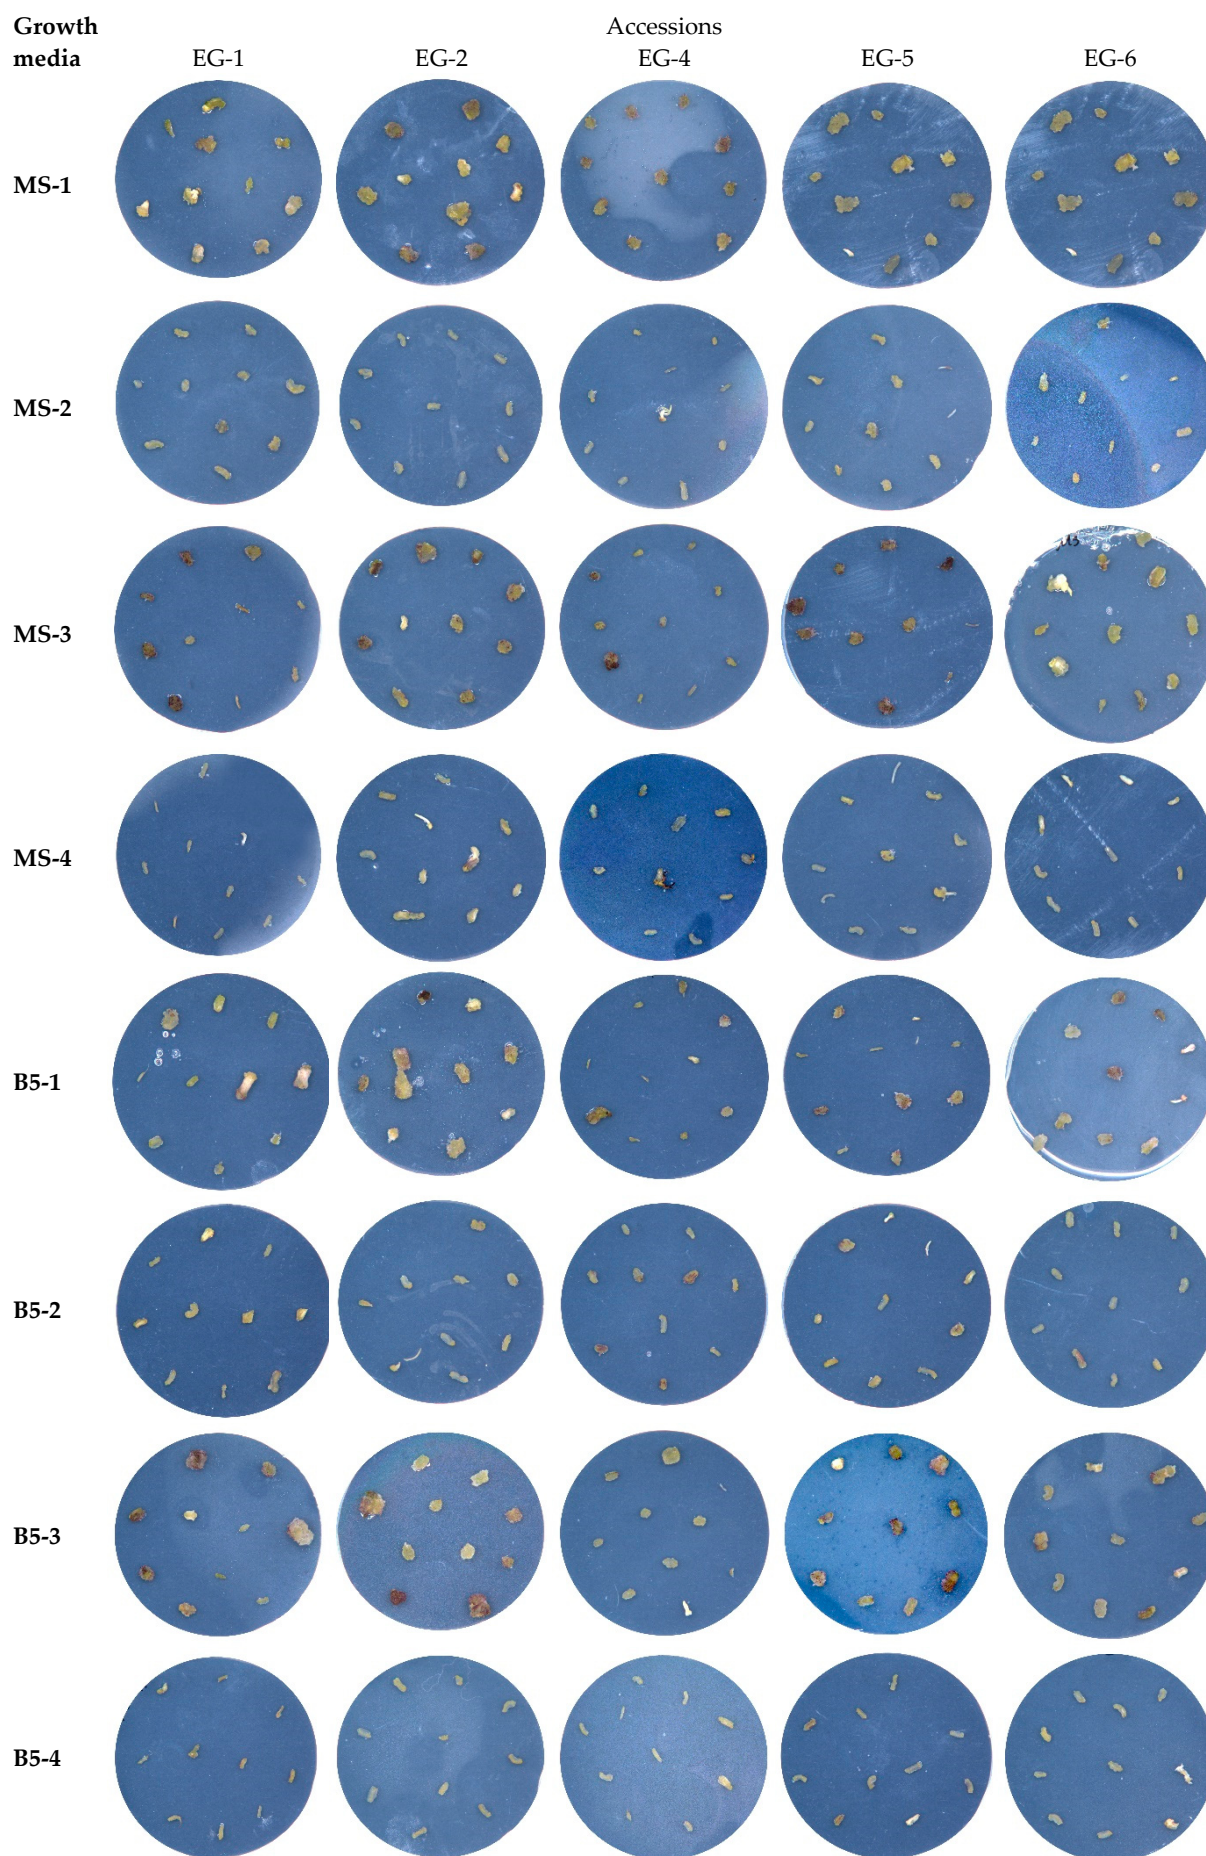

**Figure S15.** Pictures of induced callus from five cumin genotypes originated from Egypt (EG-1 and EG-2 were collected from Assiut region and EG-4, EG-5 and EG-6 were collected from El-menya region) in response to various medium combinations. MS denotes Murashige and Skoog medium and B5 means Gamborg's B5 medium; each of the two media combined with four hormonal combinations, namely, 2,4-D (4.44), 2,4-D (4.44)+ Kin (0.22), 2,4-D (8.88) and 2,4-D (8.88)+ Kin (0.22), respectively.
